# Supplementary material
Source: PubMed Central journal article supplement (PMC2259259)
Supplement: halms144653-supplement_1.pdf [file halms144653-supplement_1.pdf]

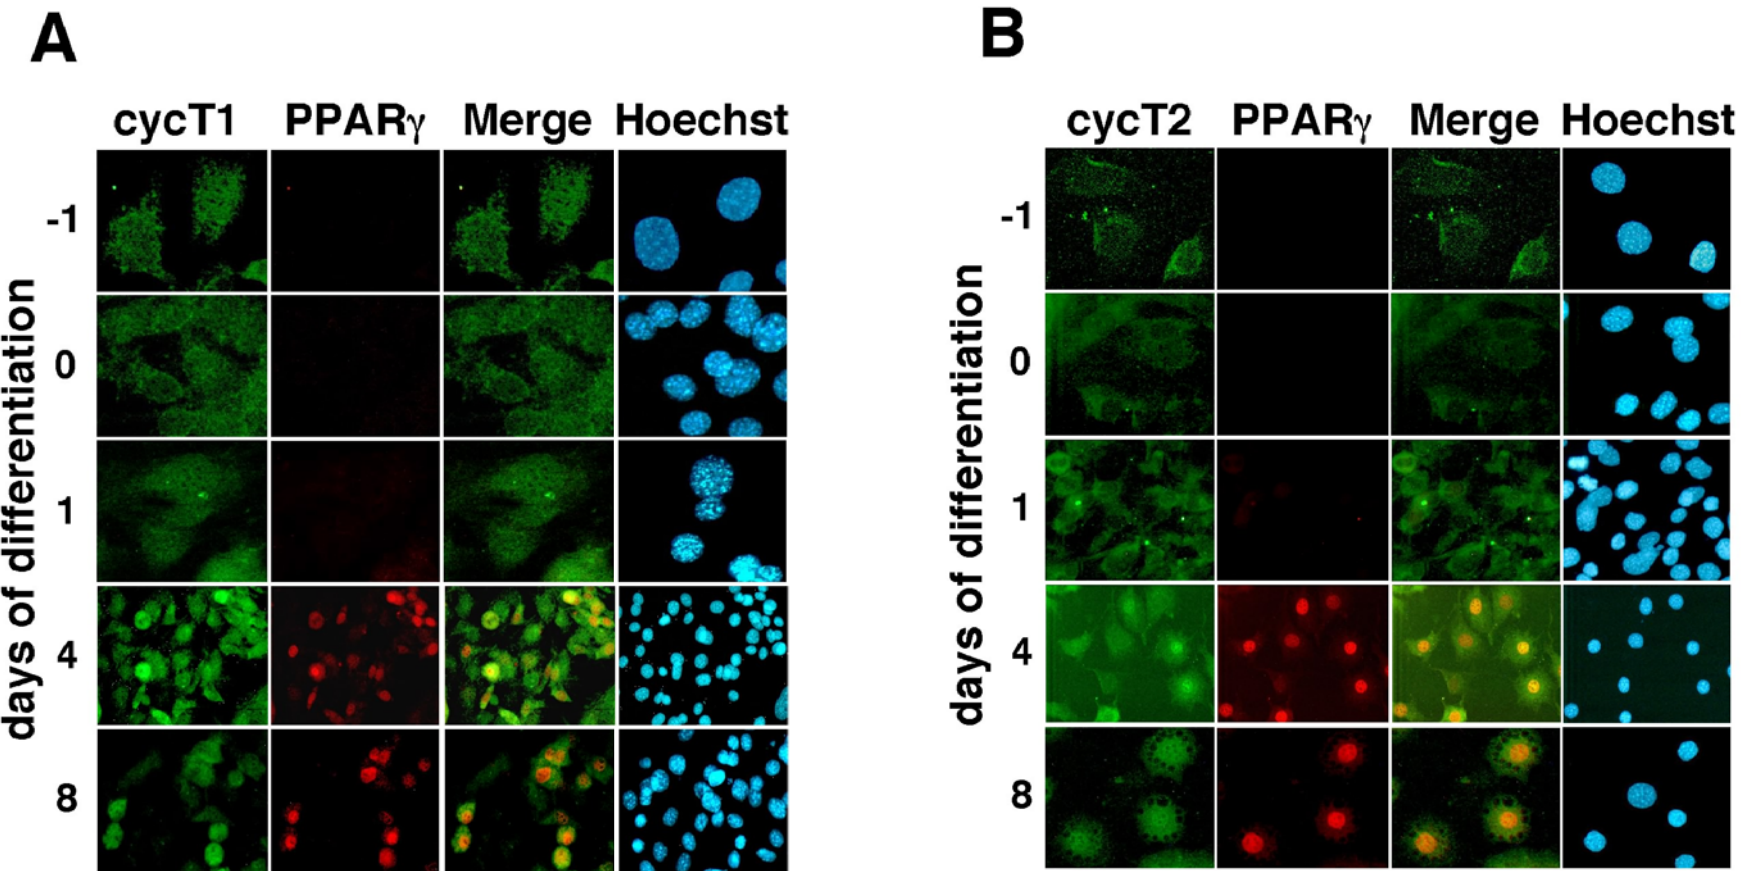

Supplemental figure 1. Expression of cyclin T1 and cyclin T2 during 3T3-L1 differentiation (A-B) Comparative analysis of PPAR $\gamma$  and cyclin T1 (A) or cyclin T2 (B) expression by immunofluorescence in 3T3-L1 cells induced to differentiate. Days of differentiation indicate proliferating (day -1), confluent (day 0), re-entry into cell cycle (day 1), early differentiation (day 4), and terminally differentiated (day 8) cells. PPAR $\gamma$  expressing cells are labeled in red whereas cyclin T1 and cyclin T2 expressing cells are in green. Nuclei were visualized with Hoechst staining.
