# Supplementary material
Source: PubMed Central journal article supplement (PMC2259259)

Supplemental figure 2. Cyclin T1 and cyclin T2 participation in adipose tissue biology  
(A-B) Expression of cyclin T1 (A) and cyclin T2 (B) mRNA measured by real-time PCR in the adipose tissue of mice fed a chow diet (C57BI/6), a high fat diet (HFD), or in the adipose tissue of obese db/db mice. Results are normalized for the expression of  $\beta$ -actin mRNA.

**A****CycT1**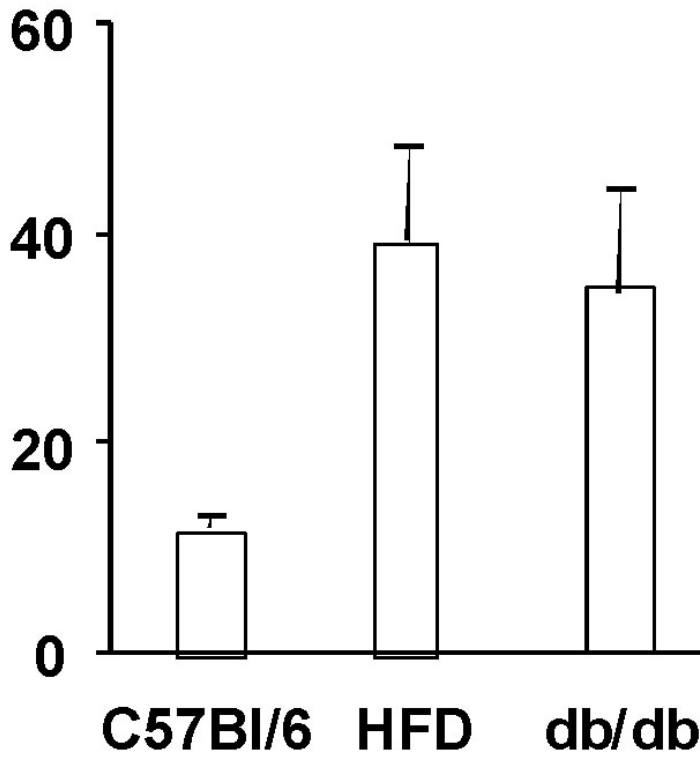**B****CycT2**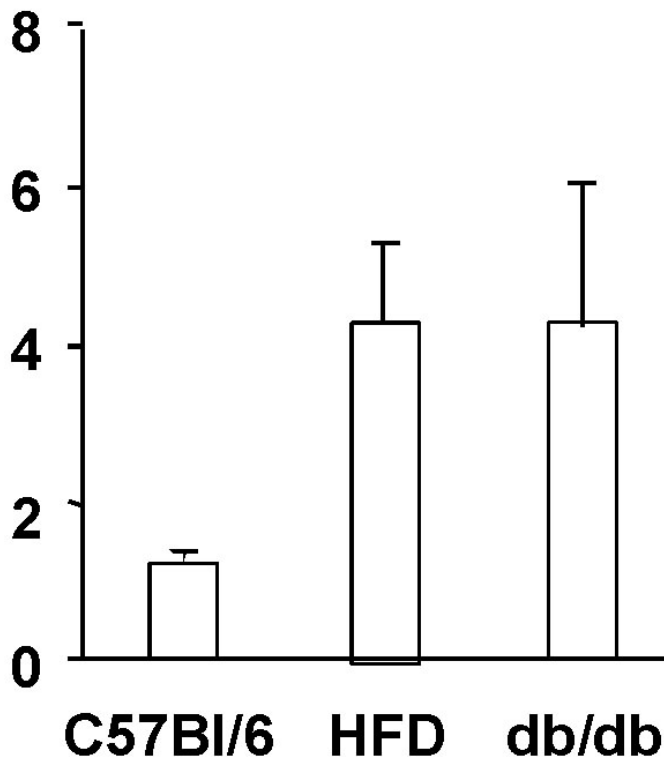

Supplement: halms144653-supplement_2.pdf [file halms144653-supplement_2.pdf]
